# Supplementary material for: Revisiting CARD-FISH for Detection of Vibrio spp. in Natural Seawater
Source: Preprints.org preprint supplement (doi:10.20944/preprints202009.0186.v1), 2020-09-08
Supplement: Supplementary file 2 [file supplementary]

**Table S1.** Oligonucleotide probes used to detect *Vibrio* spp. The table contains only probes that, according to the published literature, were used for detection of different *Vibrio* species over the last 20 years. The sequence of each probe, its specificity and citing literature are indicated.

| **PROBE** | **SEQUENCE (5’→3’)** | **HYBRIDIZATION** | **REFERENCE** | | |
| --- | --- | --- | --- | --- | --- |
| GV841 | AGGCCACAACCTCCAAGTAG | *Vibrio* genus (except *V. cholerae* and *V. mimicus*) | | 1-5 |
| MS6 | AGTTTTACATTTGCGACC | *V. shiloi* | | 6 |
| Vchomin 1276 | ACTTTGTGAGATTCGCTCCACCTCG | *V. cholerae, V. mimicus* | | 7-9 |
| VIB | ACAGTACTCTAGTCTGCCAG | *Vibrio* genus | | 10,11 |
| Vib 1 | GTGGTAGTGTTAATAGCACT | *V. vulnificus* | | 12 |
| Vib 2 | TCTAGCGGAGACGCTGGA | *V. vulnificus* | | 12 |
| Vib 3R | GCTCACTTTCGCAAGTTGGCC | *V. vulnificus* | | 12 |
| Vib-16S-1 | AGGAGCTTCGCTTGC | *Vibrio* genus | | 13 |
| VIB572a | ACCACCTGCATGCGCTTT | *Vibrio* genus (occasionally *Photobacterium* and *Listonella)* | | 5,14-16 |
| VIB572b | ACCGCCTGCATGCGCTTT | *Vibrio, Photobacterium* | | 14 |
| Vib749 | TCGCATCTGAGTGTCAGT | *Vibrio, Aliivibrio* | | 5 |
| Vvul3 | TCCTCACGACTGAAAG | *V. vulnificus* | | 7 |

1. Giuliano, L.; De Domenico, M.; De Domenico, E.; Höfle, M.; Yakimov, M. Identification of culturable oligotrophic bacteria within naturally occurring bacterioplankton communities of the Ligurian Sea by 16S rRNA sequencing and probing. *Microb. Ecol.* **1999**, *37*, 77-85. doi: 10.1007/s002489900132.

2. Arboleda. M.; Reichardt, W. Epizoic communities of prokaryotes on healthy and diseased scleractinian corals in Lingayen Gulf, Philippines. *Microb. Ecol.* **2009***, 5:*117-28. doi: 10.1007/s00248-008-9400-0.

3. Tada, Y.; Taniguchi, A.; Hamasaki, K. Phylotype-specific productivity of marine bacterial populations in eutrophic seawater, as revealed by bromodeoxyuridine immunocytochemistry combined with fluorescence in situ hybridization. *Microbes Environ.* **2009**, *24*, 315-321. doi: 10.1007/s00248-008-9400-0.

4. Oberbeckmann, S.; Fuchs, B.M.; Meiners, M.; Wichels, A.; Wiltshire, K.H.; Gerdts, G. Seasonal dynamics and modeling of a *Vibrio* community in coastal waters of the North Sea. *Microb. Ecol.* **2012**. *63*, 543-551. doi: 10.1007/s00248-011-9990-9.

5. Girard, L.; Peuchet, S.; Servais, P.; Henry, A.; Charni-Ben-Tabassi, N.; Baudart, J. Spatiotemporal dynamics of total viable *Vibrio* spp. in a NW Mediterranean coastal area. *Microbes Environ.* **2017**, *32*, 210-218. doi: 10.1264/jsme2.ME17028.

6. Sussman, M.; Loya, Y.; Fine, M.; Rosenberg, E. The marine fireworm *Hermodice carunculata* is a winter reservoir and spring-summer vector for the coral-bleaching pathogen *Vibrio shiloi*. *Environ. Microbiol.* **2003**, *5*, 250–255. doi: 10.1046/j.1462-2920.2003.00424.x

7. Heidelberg, J.F.; Heidelberg, K.B.; Colwell, R.R. Bacteria of the gamma-subclass Proteobacteria associated with zooplankton in Chesapeake Bay. *Appl. Environ. Microbiol.* **2002**, *68*, 5498–5507. doi: 10.1128/aem.68.11.5498-5507.2002.

8. Kirschner, A.K.T.; Schauer, S.; Steinberger, B.; Wilhartitz, I.; Grim, C.J.; Huq, A.; Colwell, R.R.; Herzig, A.; Sommer, R. Interaction of *Vibrio cholerae* non-O1/non-O139 with Copepods, Cladocerans and competing bacteria in the Large Alkaline Lake Neusiedler See, Austria. *Microb. Ecol.* **2010**, *61*, 496-506. doi: 10.1007/s00248-010-9764-9

9. Schauer, S.; Sommer, R. ; Farnleitner, A.H.; Kirschner, A.K. Rapid and sensitive quantification of *Vibrio cholerae* and *Vibrio mimicus* cells in water samples by use of Catalyzed Reporter Deposition Fluorescence In Situ Hybridization combined with Solid-Phase Cytometry. *Appl. Environ. Microbiol.* **2012**, *78*, 7369–7375. doi: 10.1128/AEM.02190-12.

10. Moreno, Y.; Arias, C.R.; Meier, H.; Garay, E.; Aznar, R. *In situ* analysis of the bacterial communities associated to farmed eel by whole-cell hybridization. *Lett. Appl. Microbiol.* **1999**, *29*, 160–165. doi: 10.1046/j.1365-2672.1999.00588.x.

11. Cañigral Cárcel, I. Desarrollo de métodos moleculares para la detección y caracterización de bacterias patógenas emergentes del género *Vibrio* en aguas y alimentos. PhD Thesis, Universitat Politècnica de València, Spain, **2011**.

12. Kim, M.S.; Jeong, H.D. Development of 16S rRNA targeted PCR methods for the detection and differentiation of *Vibrio vulnificus* in marine environments. *Aquaculture.* **2001**, *193*, 199-211. doi: 10.1016/S0044-8486(00)00495-6.

13. Zhang, X.; Li, K.; Wu, S.; Shuai, J.; Fang, W. Peptide nucleic acid fluorescence in-situ hybridization for identification of *Vibrio* spp. in aquatic products and environments. *Int. J. Food Microbiol.* **2015**, *206*, 39-44. doi: 10.1016/j.ijfoodmicro.2015.04.017.

14. Huggett, M.J.; Crocetti, G.R.; Kjelleberg, S.; Steinberg, P.D. Recruitment of the sea urchin *Heliocidaris erythrogramma* and the distribution and abundance of inducing bacteria in the field. *Aquat. Microb. Ecol.* **2008**, *53*, 161-171. doi: 10.3354/ame01239.

15. Pereira, C.; Salvador, S.; Arrojado, C.; Silva, Y.; Santos, A.L.; Cunha, A.; Gomes, N.C.M.; Almeida, A. Evaluating seasonal dynamics of bacterial communities in marine fish aquaculture: a preliminary study before applying phage therapy. *J. Environ. Monit*. **2011**, *13*, 1053-1058. doi: 10.1039/C0EM00434K.

16. Bellés-Garulera, J.; Vila, M.; Borrull, E.; Riobó, P.; Franco, J.M.; Sala, M.M. Variability of planktonic and epiphytic vibrios in a coastal environment affected by *Ostreopsis* blooms. *Sci. Mar*. **2016**, *80S1*, 97-106. doi: 10.3989/scimar.04405.01A..

**Table S2.** The main characteristics of pre-selected CARD-FISH probes according to SILVA database. The percentage of coverage and specificity of three probes (i.e. GV841, Vib-16S-1 and VIB572a) are indicated. The taxa potentially detected by these probes are included only if the percentage of coverage and specificity is higher than 75%.

| **TAXA** | **PROBES** | | | | | |
| --- | --- | --- | --- | --- | --- | --- |
| **GV 841** | | **Vib-16S-1** | | **VIB572a** | |
| **Coverage**  **(%)** | **Specificity (%)** | **Coverage (%)** | **Specificity (%)** | **Coverage (%)** | **Specificity (%)** |
| Alteromonadales; Alteromonadaceae; *Gayadomonas* | 0 | 0 | 100 | 99.3 | 0 | 0 |
| Alteromonadales; Gallaecimonadaceae; *Gallaecimonas* | 0 | 0 | 100 | 99.3 | 0 | 0 |
| Enterobacteriales; Enterobacteriaceae; endosymbionts10 | 0 | 0 | 100 | 99.3 | 0 | 0 |
| Vibrionales; Vibrionaceae; *Candidatus Photodesmus* | 50 | 99.3 | 100 | 99.3 | 25 | 99.3 |
| Aeromonadales; Aeromonadaceae; *Oceanisphaera* | 0 | 0 | 94.4 | 99.3 | 0 | 0 |
| Pasteurellales; Pasteurellaceae; *Avibacterium* | 0 | 0 | 94.1 | 99.3 | 0 | 0 |
| Alteromonadales; Alteromonadaceae; *Catenovulum* | 0 | 0 | 92.3 | 99.3 | 0 | 0 |
| Vibrionales; Vibrionaceae; *Vibrio* | 89.9 | 99.9 | 92.1 | 99.9 | 94 | 100 |
| Vibrionales | 78 | 100 | 76.1 | 99.9 | 78.9 | 100 |
| Vibrionales; Vibrionaceae | 78 | 100 | 76.1 | 99.9 | 78.9 | 100 |
| Vibrionales; Vibrionaceae; *Aliivibrio* | 60.2 | 99.4 | 1.4 | 99.3 | 95.6 | 99.4 |
| Vibrionales; Vibrionaceae; *Catenococcus* | 93.8 | 99.3 | 56.3 | 99.3 | 93.8 | 99.3 |

**Table S3.** The main characteristics of pre-selected CARD-FISH probes determined by BLAST. Indicated are coverage (QC, query cover, %), identity (Ident, %), matches (Match) and E value (i.e. the probability of finding the sequence among all organisms within this database). The taxa potentially detected by these probes are included only if the percentage of coverage and specificity is higher than 75%.

| **TAXA** | **PROBES** | | | | | | | | | | | | |
| --- | --- | --- | --- | --- | --- | --- | --- | --- | --- | --- | --- | --- | --- |
| **GV 841** | | | | **Vib-16S-1** | | | | **VIB572a** | | | | |
| **QC** | **Ident** | **Match** | **E** | **QC** | **Ident** | **Match** | **E** | | **QC** | **Ident** | **Match** | **E** | |
| Alteromonadales; Alteromonadaceae; *Gayadomonas* | 75 | 100 | 8/20 | 0.53 | 43 | 100 | 7/16 | 2.7 | | 94 | 88.24 | 15/18 | 0.11 | |
| Alteromonadales; Gallaecimonadaceae; *Gallaecimonas* | 70 | 92.86 | 13/20 | 25 | 43 | 100 | 7/16 | 774* | | 77 | 92.86 | 13/18 | 19* | |
| Enterobacteriales; Enterobacteriaceae; endosymbionts10 | 100-90 | 100 | 20/20-18/20 | 0.025-0.40 | 87 | 100 | 14/16 | 100* | | 77 | 100 | 14/18 | 99* | |
| Vibrionales; Vibrionaceae; *Candidatus Photodesmus* | 100 | 100 | 20/20 | 4 10-7* | 62 | 100 | 7/16 | 13 | | 100 | 100 | 18/18 | 5 10-6* | |
| Aeromonadales; Aeromonadaceae; *Oceanisphaera* | 45 | 100 | 9/20 | 138 | 100 | 100 | 12/16 | 0.029* | | 77 | 92.86 | 13/18 | 30* | |
| Pasteurellales; Pasteurellaceae; *Avibacterium* | 40 | 100 | 8/20 | 449* | 100 | 100 | 12/16 | 1* | | 44 | 100 | 10/18 | 385* | |
| Alteromonadales; Alteromonadaceae; *Catenovulum* | 40 | 100 | 8/20 | 497* | 100 | 100 | 8/16 | 0.3* | | 94 | 88.24 | 15/18 | 108* | |
| Vibrionales; Vibrionaceae; *Vibrio* | 100 | 100 | 20/20 | 0,004 | 100 | 100 | 16/16 | 0.49* | | 100 | 100 | 18/18 | 0.031 | |
| Vibrionales | 100 | 100 | 20/20 | 0.004 | 100 | 100 | 16/16 | 0.51* | | 100 | 100 | 18/18 | 0.033 | |
| Vibrionales; Vibrionaceae | 100 | 100 | 20/20 | 0,004 | 100 | 100 | 16/16 | 0,51* | | 100 | 100 | 18/18 | 0.033 | |
| Vibrionales; Vibrionaceae; *Aliivibrio* | 100 | 100 | 20/20 | 1 10-4 | 100 | 100 | 13/16 | 0,92* | | 100 | 100 | 18/18 | 0.002 | |
| Vibrionales; Vibrionaceae; *Catenococcus* | 100 | 100 | 20/20 | 2 10-7 | 50 | 100 | 7/16 | 6.7 | | 100 | 100 | 18/18 | 2 10-6 | |

* The probe is complementary to non-16S rRNA genome regions.


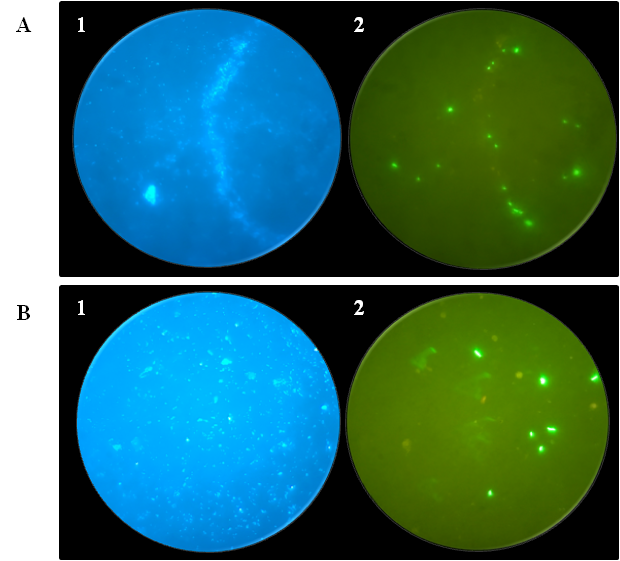


**Figure S1.** CARD-FISH detection of *Vibrio* spp. in environmental samples. Water samples from coastal (panel A) or estuarine (panel B) areas were stained with DAPI (image 1) or were either subjected to CARD-FISH detection using VIB572a (image 2) and further examined by epifluorescence microscopy as described in Materials and Methods.
